# Supplementary material
Source: MDPI journal article supplement (https://www.mdpi.com/2077-0472/13/10/1867)
Supplement: s1 [file s1]

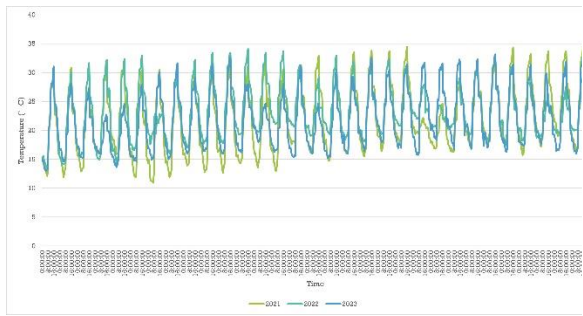

(a)

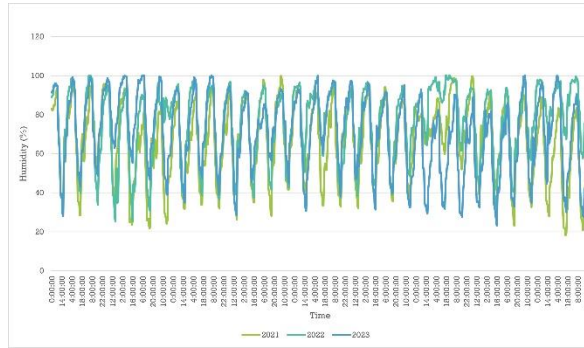

(b)

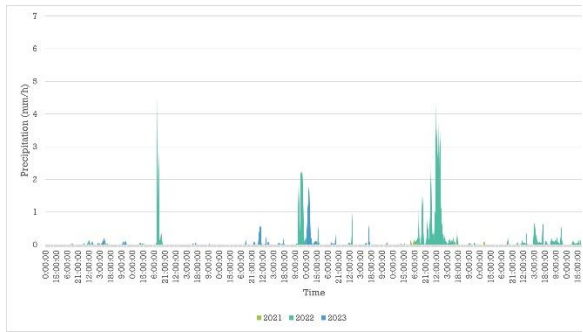

(c)

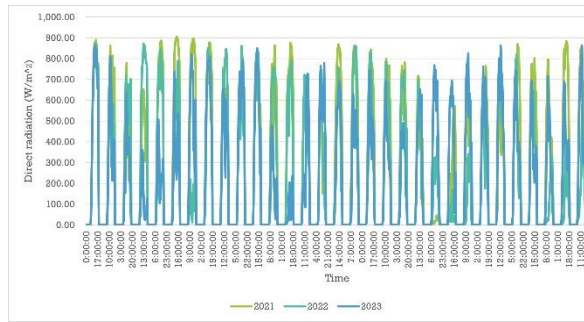

(d)

Figure S1. Depicting environmental data for the sample site, measured on an hourly basis for the month of March in the years 2021 to 2023. (a) Temperature Data for the Sample Site from March 2021 to March 2023(b) Humidity Data for the Sample Site from March 2021 to March 2023(c)Precipitation Data for the Sample Site from March 2021 to March 2023(d) Direct Radiation Data for the Sample Site from March 2021 to March 2023
